# Supplementary material for: Protein corona-guided tumor targeting therapy via the surface modulation of low molecular weight PEG
Source: Royal Society of Chemistry journal article supplement (doi:10.1039/d1nr00426c), 2021-01-01
Supplement: d1nr00426c1.pdf [file d1nr00426c1.pdf]

## Supporting Information

for

### **Protein corona-guided tumor targeting therapy *via* the surface modulation of low molecular weight PEG**

Teng Cui,<sup>†a,b,c</sup> Yu Ma,<sup>†a</sup> Jian-Yong Yang,<sup>b</sup> Shang Liu,<sup>d</sup> Zhenzhen Wang,<sup>d</sup> Fenfen Zhang,<sup>a,e</sup> Jing Wang,<sup>a</sup> Ting Cai,<sup>a</sup> Lei Dong,<sup>d</sup> Jin Hong,<sup>f</sup> Hai Qian,<sup>\*b</sup> Can Zhang,<sup>\*b</sup> Ya Ding<sup>\*a</sup>

<sup>a</sup> Key Laboratory of Drug Quality Control and Pharmacovigilance, Ministry of Education, China Pharmaceutical University, Nanjing 210009, China

<sup>b</sup> State Key Laboratory of Natural Medicines, Jiangsu Key Laboratory of Drug Discovery for Metabolic Diseases, Center of Drug Discovery, China Pharmaceutical University, Nanjing 210009, China

<sup>c</sup> School of pharmacy, Jining medical college, Jining 276826, China

<sup>d</sup> State Key Laboratory of Pharmaceutical Biotechnology, School of Life Sciences, Nanjing University, 163 Xianlin Avenue, Nanjing 210093, China

<sup>e</sup> Research Center for Analysis and Measurement, Donghua University, Shanghai 201620, China

<sup>f</sup> Key Laboratory of Biomedical Functional Materials, School of Sciences, Ministry of Education, China Pharmaceutical University, Nanjing 211198, China

<sup>†</sup> The first two authors contributed equally to this work.

\* Corresponding author: E-mail: qianhai24@cpu.edu.cn (H. Qian); zhangcan@cpu.edu.cn (C. Zhang); dingya@cpu.edu.cn (Y. Ding)

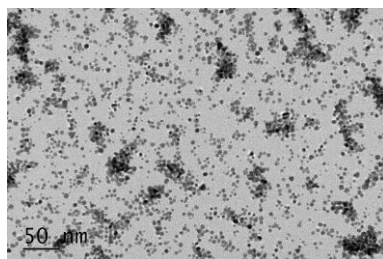

**Figure S1.** TEM image of citrate-protected GNPs.

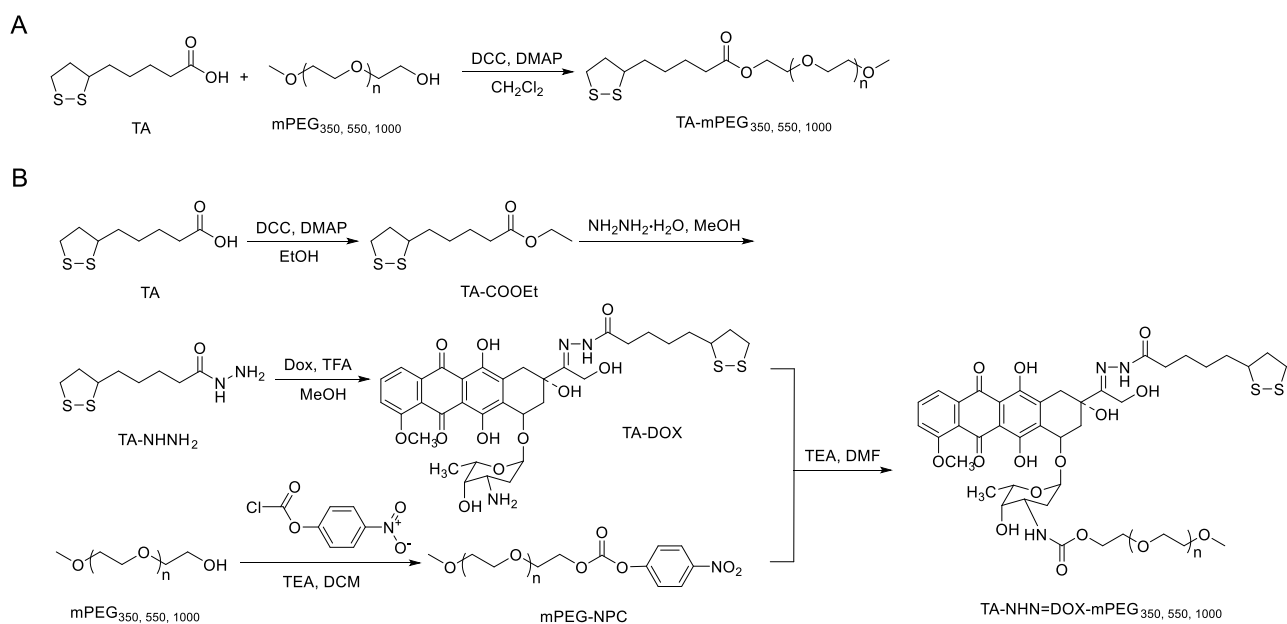

**Figure S2.** Synthetic procedures of (A) TA-mPEG and (B) TA-NHN=DOX-mPEG with different PEG molecular weights of 350, 550, and 1000 Da.

TA-NHN=DOX-mPEG<sub>350</sub><sup>1</sup>H-NMR DMSO-d<sub>6</sub> 300k AV-300

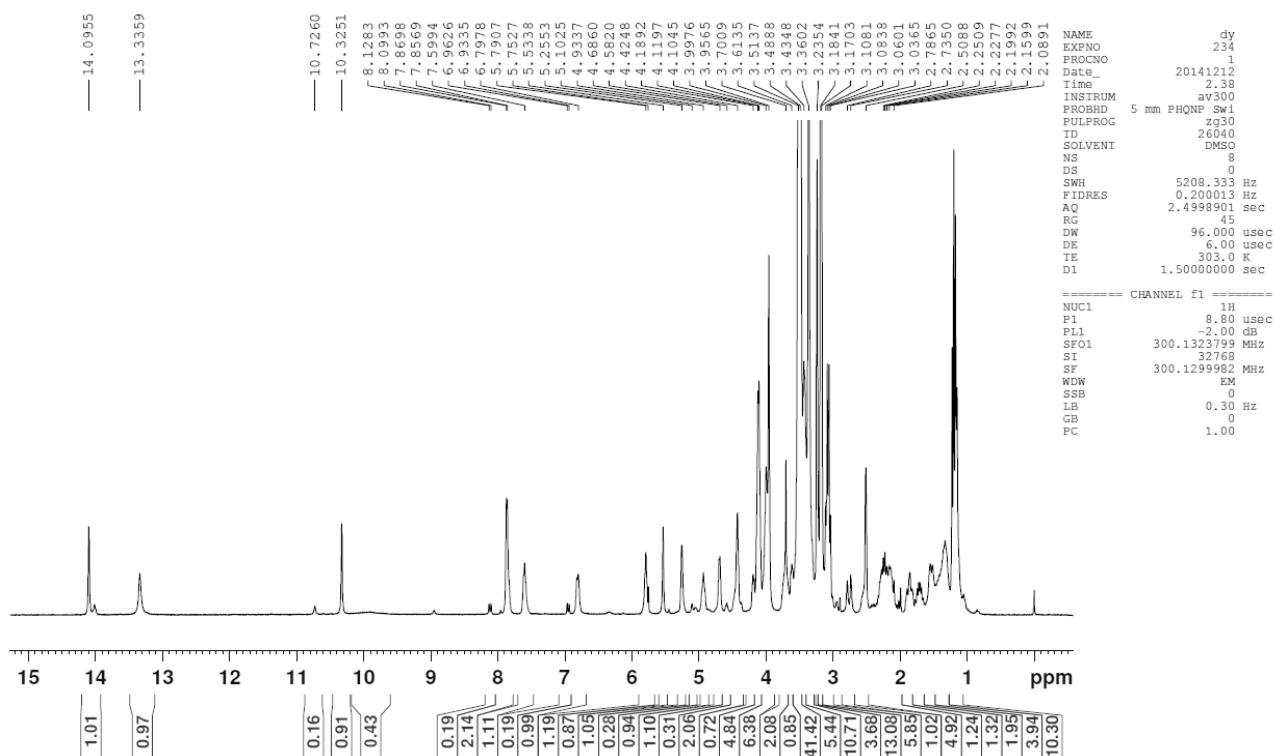

Figure S3. <sup>1</sup>H NMR spectrum of TA-NHN=DOX-mPEG<sub>350</sub>.

TA-NHN=DOX-mPEG<sub>550</sub><sup>1</sup>H-NMR DMSO-d<sub>6</sub> 300k AV-300

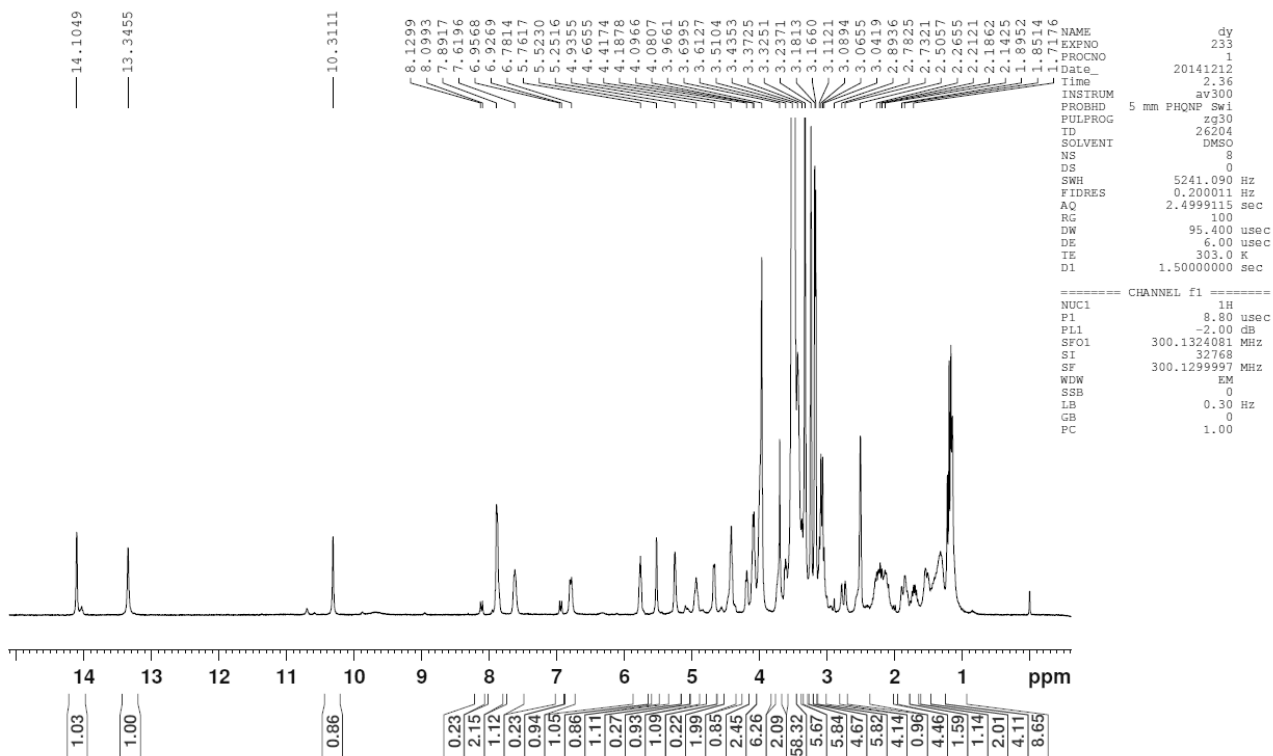

Figure S4. <sup>1</sup>H NMR spectrum of TA-NHN=DOX-mPEG<sub>550</sub>.

TA-NHN=DOX-mPEG<sub>1000</sub><sup>1</sup>H-NMR DMSO-d<sub>6</sub> 300k AV-300

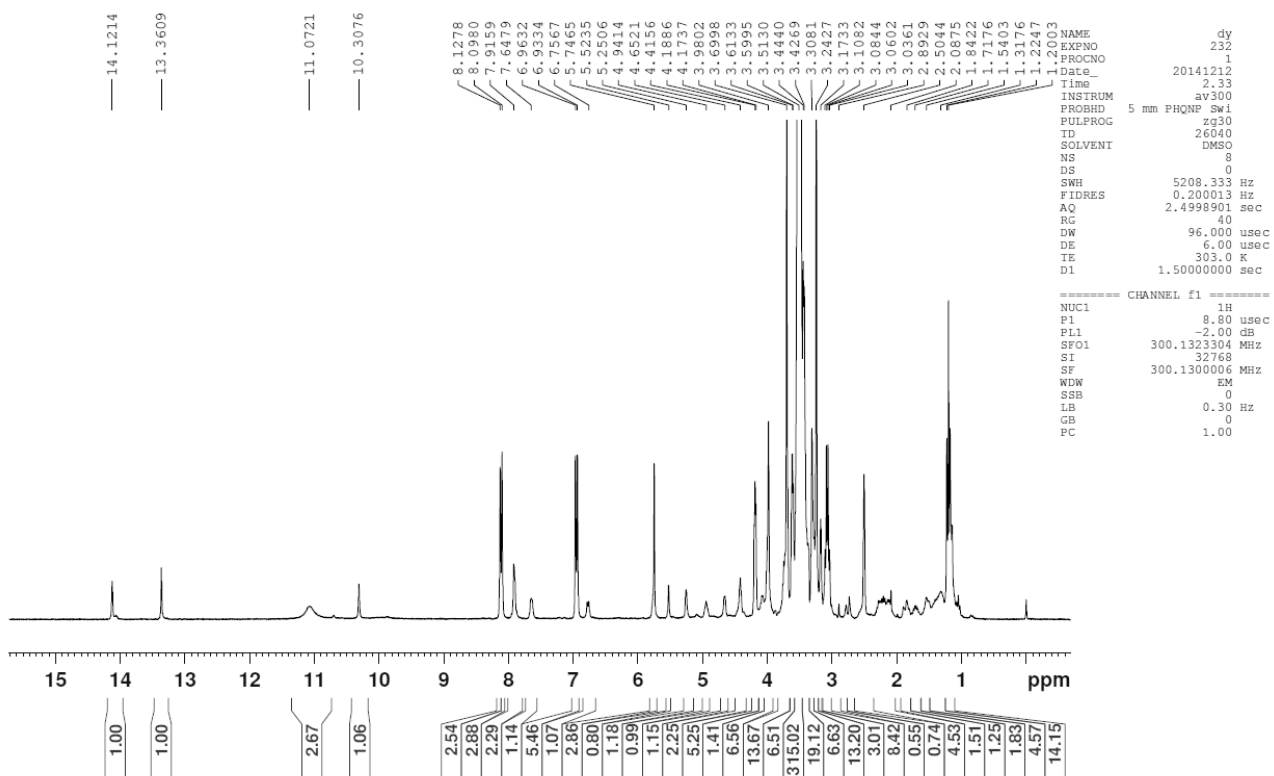

Figure S5. <sup>1</sup>H NMR spectrum of TA-NHN=DOX-mPEG<sub>1000</sub>.

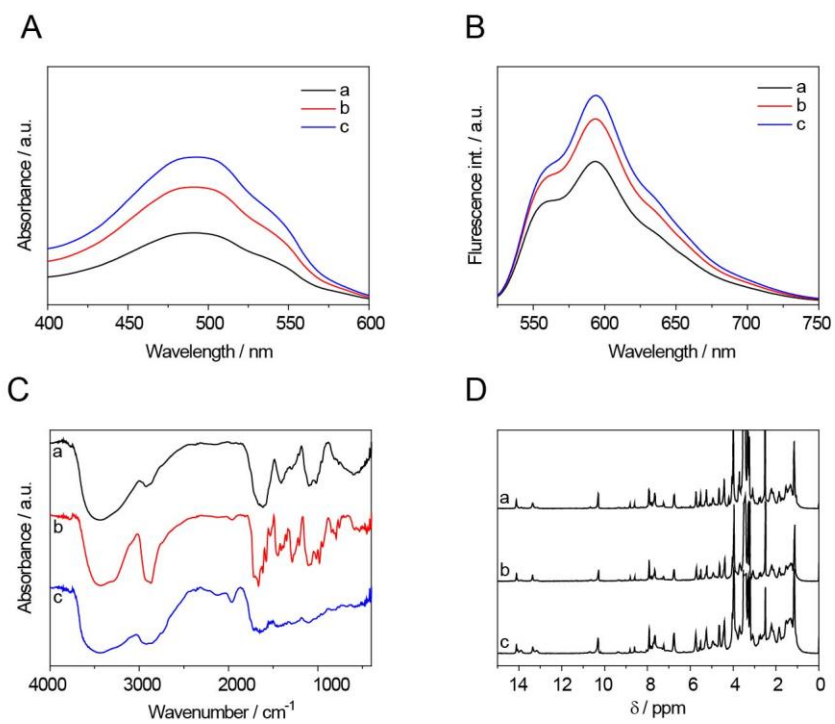

**Figure S6.** (A) UV-Vis, (B) fluorescence, (C) FT-IR, and (D)  $^1\text{H}$  NMR spectra of (a) Conj-350, (b) Conj-550, and (c) Conj-1000.

A

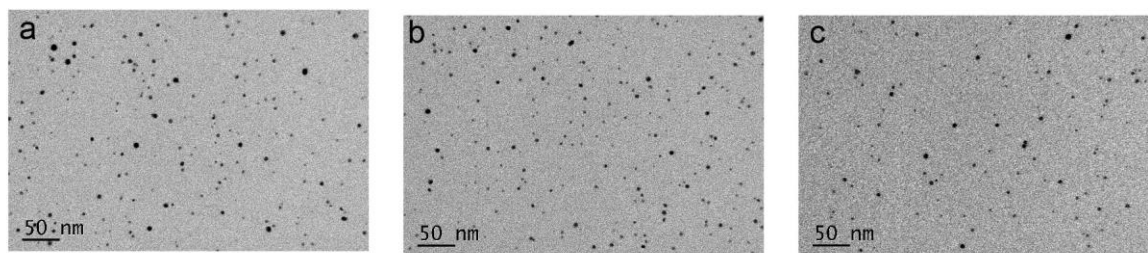

B

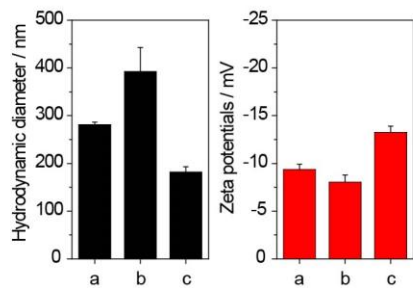

C

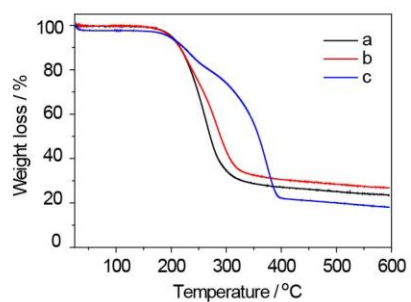

**Figure S7.** (A) TEM images, (B) hydrodynamic diameters and zeta potentials, and (C) TGA curves of (a) Conj-350, (b) Conj-550, and (c) Conj-1000. The data in (B) represents the mean  $\pm$  SD (n=3).



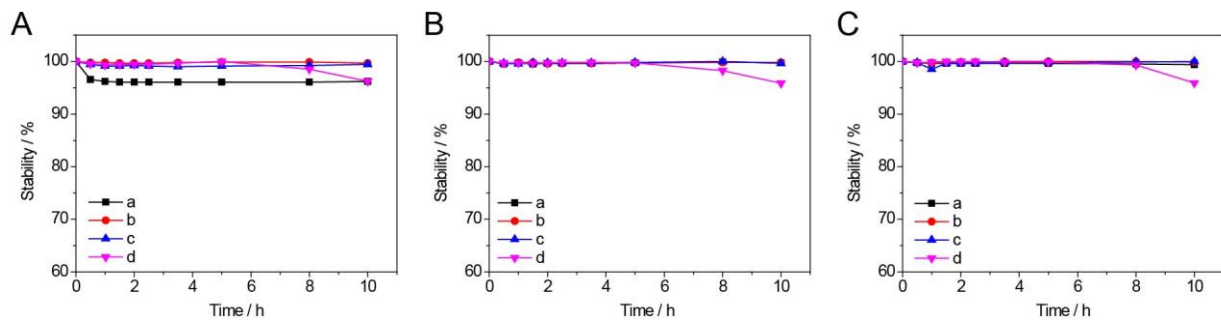

**Figure S8.** Stability of (A) Conj-350, (B) Conj-550, and (C) Conj-1000 in different media: (a) 0.03 M PBS at pH 7.4, (b) 0.03 M PBS at pH 5.5, (c) 0.2 M PBS at pH 7.4, and (d) 0.03 M, pH 7.4 PBS containing 2% FBS. The data represents the mean  $\pm$ SD (n=3).

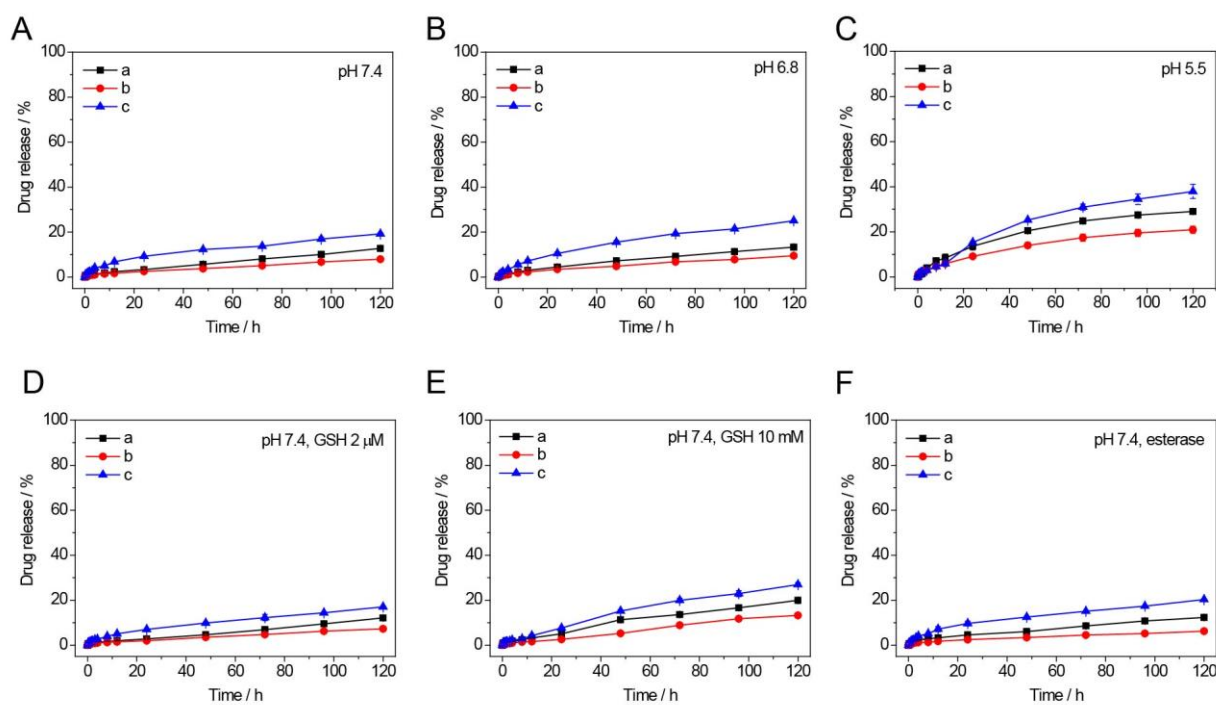

**Figure S9.** *In vitro* drug release of (a) Conj-350, (b) Conj-550, and (c) Conj-1000 in PBS at (A) pH 7.4, (B) pH 6.8, (C) pH 5.5, (D) pH 7.4 with 2 μM GSH, (E) pH 7.4 with 10 mM GSH, and (F) pH 7.4 with 20 unit/mL porcine liver esterase (PLE). The data represents the mean ± SD (n=3).

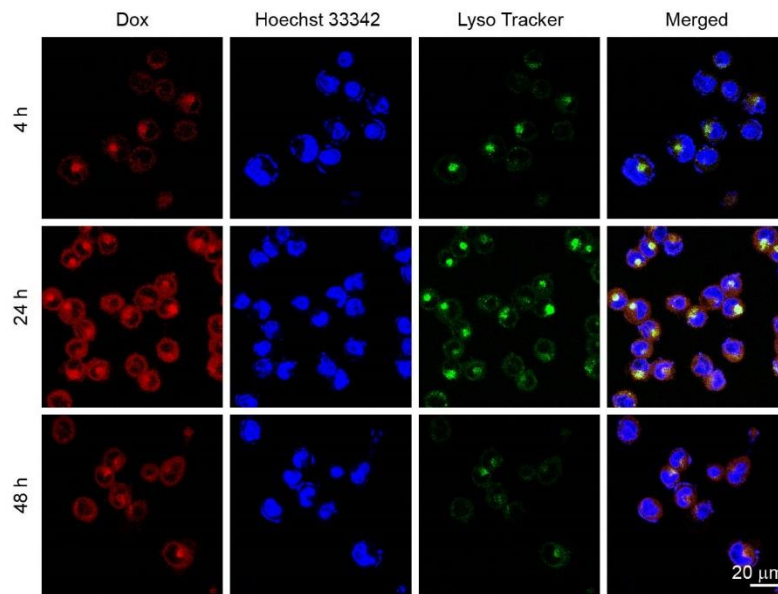

**Figure S10.** (A) CLSM images of HepG2 cells after incubated with Conj-350 at 37 °C for 4, 24, and 48 h, respectively. The nuclei and mitochondria were stained by Hoechst 33342 and LysoTracker, respectively. The scale bar is 20 μm.

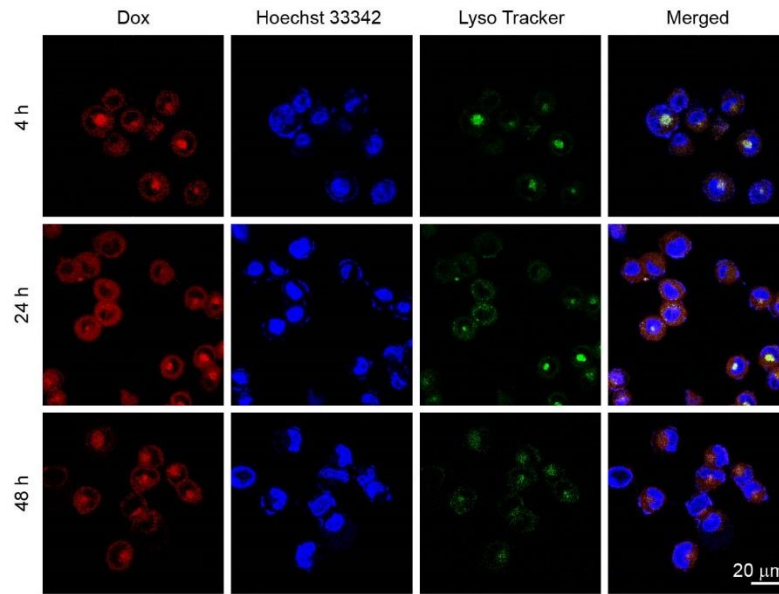

**Figure S11.** (A) CLSM images of HepG2 cells after incubated with Conj-1000 at 37 °C for 4, 24, and 48 h, respectively. The nuclei and mitochondria were stained by Hoechst 33342 and LysoTracker, respectively. The scale bar is 20 μm.
